# Supplementary material
Source: PubMed Central journal article supplement (PMC1422170)

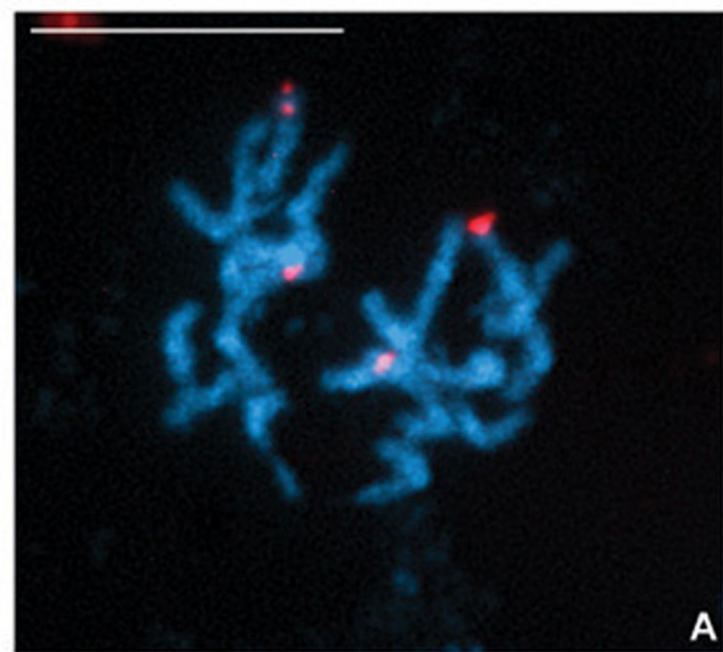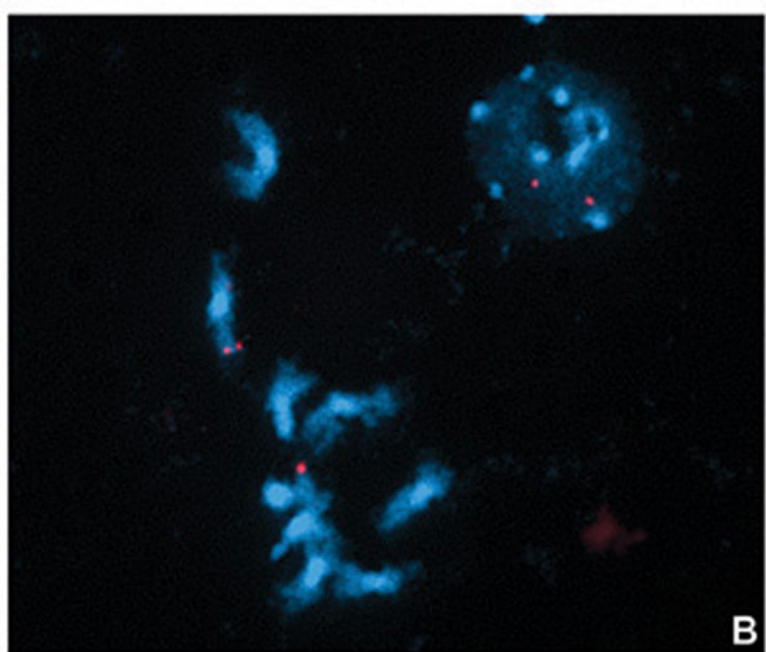

Supplement: 7600992s1.pdf [file 7600992s1.pdf]

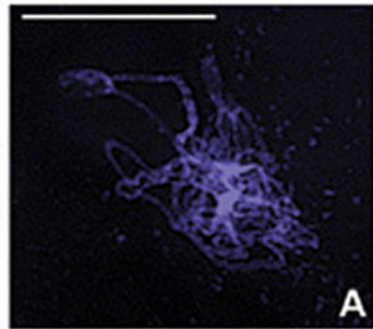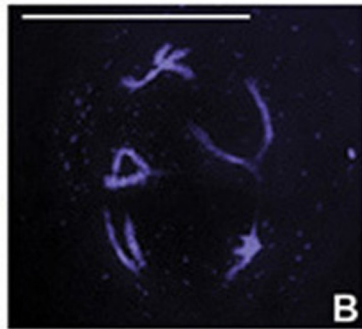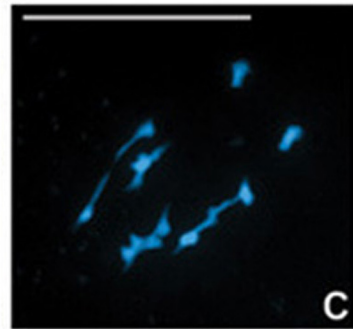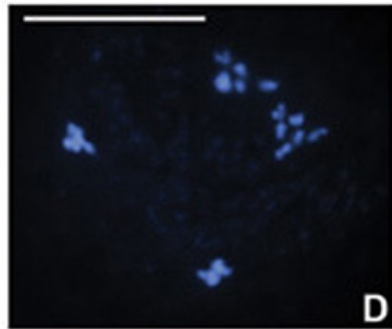

Supplement: 7600992s2.pdf [file 7600992s2.pdf]

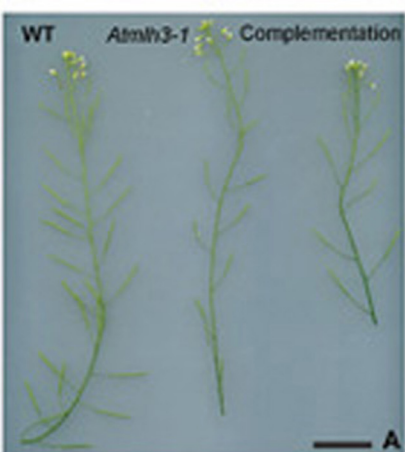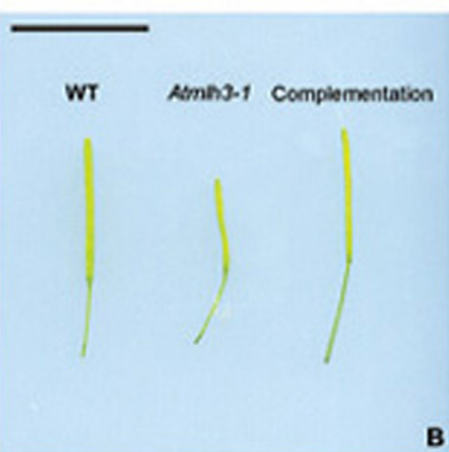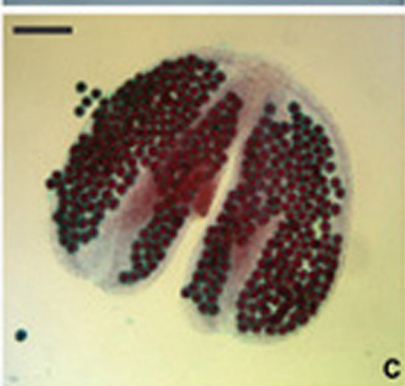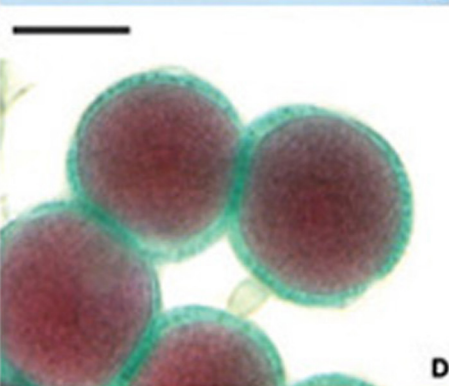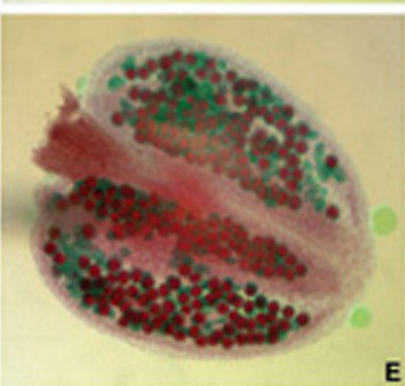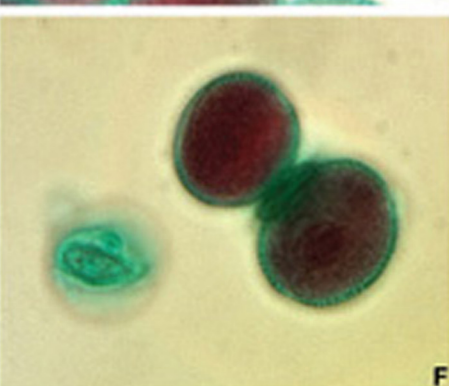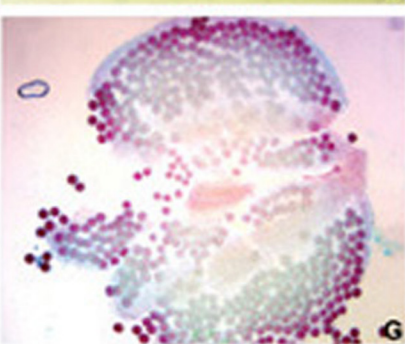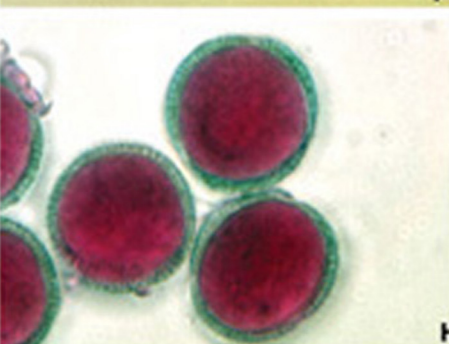

Supplement: 7600992s3.pdf [file 7600992s3.pdf]

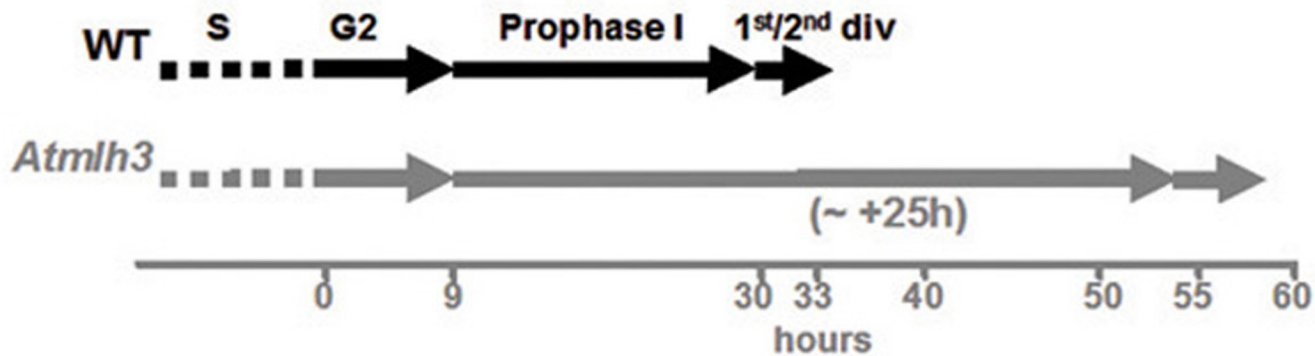

Supplement: 7600992s5.pdf [file 7600992s5.pdf]
